# Supplementary material for: Interfacial Interaction in NiFe LDH/NiS2/VS2 for Enhanced Electrocatalytic Water Splitting
Source: MDPI journal article supplement (doi:10.3390/molecules29050951), 2024-02-21
Supplement: s1 [file s1]

# Supporting Information

## Interfacial interaction in NiFe LDH/NiS<sub>2</sub>/VS<sub>2</sub> for enhanced electrocatalytic water splitting

Tingxia Wang \*, Xu Zhang, Xiaojiao Yu \*, Junpeng Li, Zongbin Liu and Jinfen Niu

School of Science, Xi'an University of Technology, Xi'an, Shaanxi, 710054, China

E-mail: wangtingxia@xaut.edu.cn (Tingxia Wang). yxjw@xaut.edu.cn (Xiaojiao Yu)

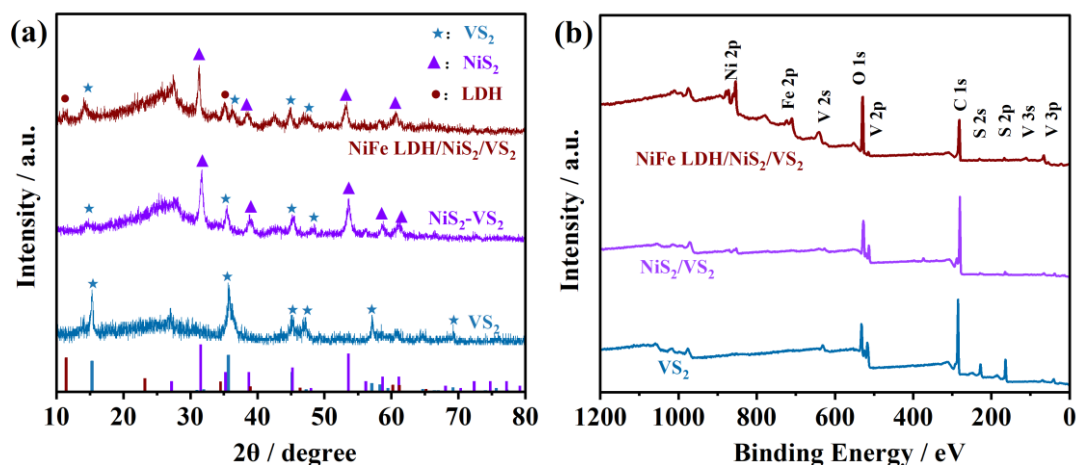

**Figure S1.** (a)XRD patterns and (b) XPS survey spectra of the prepared VS<sub>2</sub>, NiS<sub>2</sub>/VS<sub>2</sub> and NiFe LDH/NiS<sub>2</sub>/VS<sub>2</sub>.

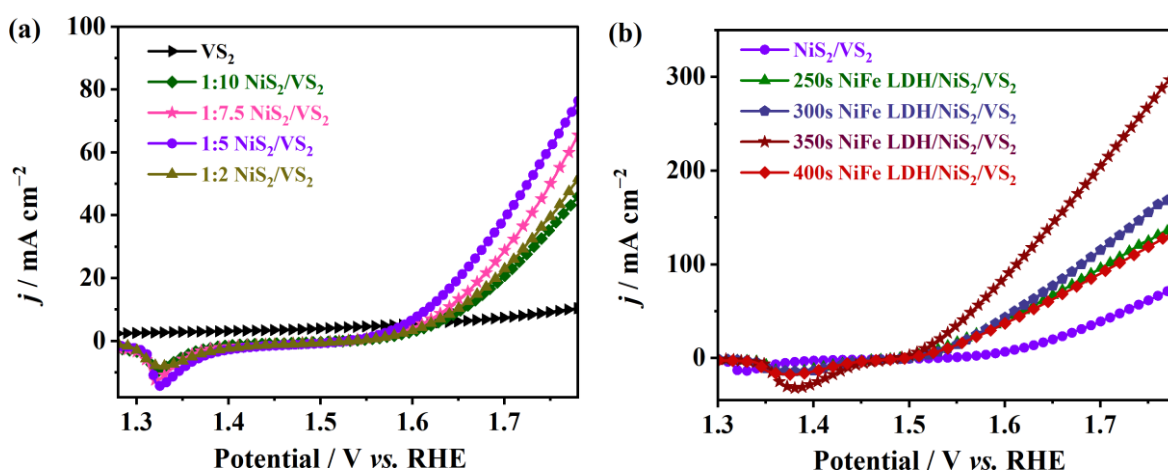

**Figure S2.** Electrocatalytic OER activity of (a) the VS<sub>2</sub> and NiS<sub>2</sub>/VS<sub>2</sub> with different

addition ratio of nickel source and (b) the NiFe LDH/NiS<sub>2</sub>/VS<sub>2</sub> with different electrodeposition time.

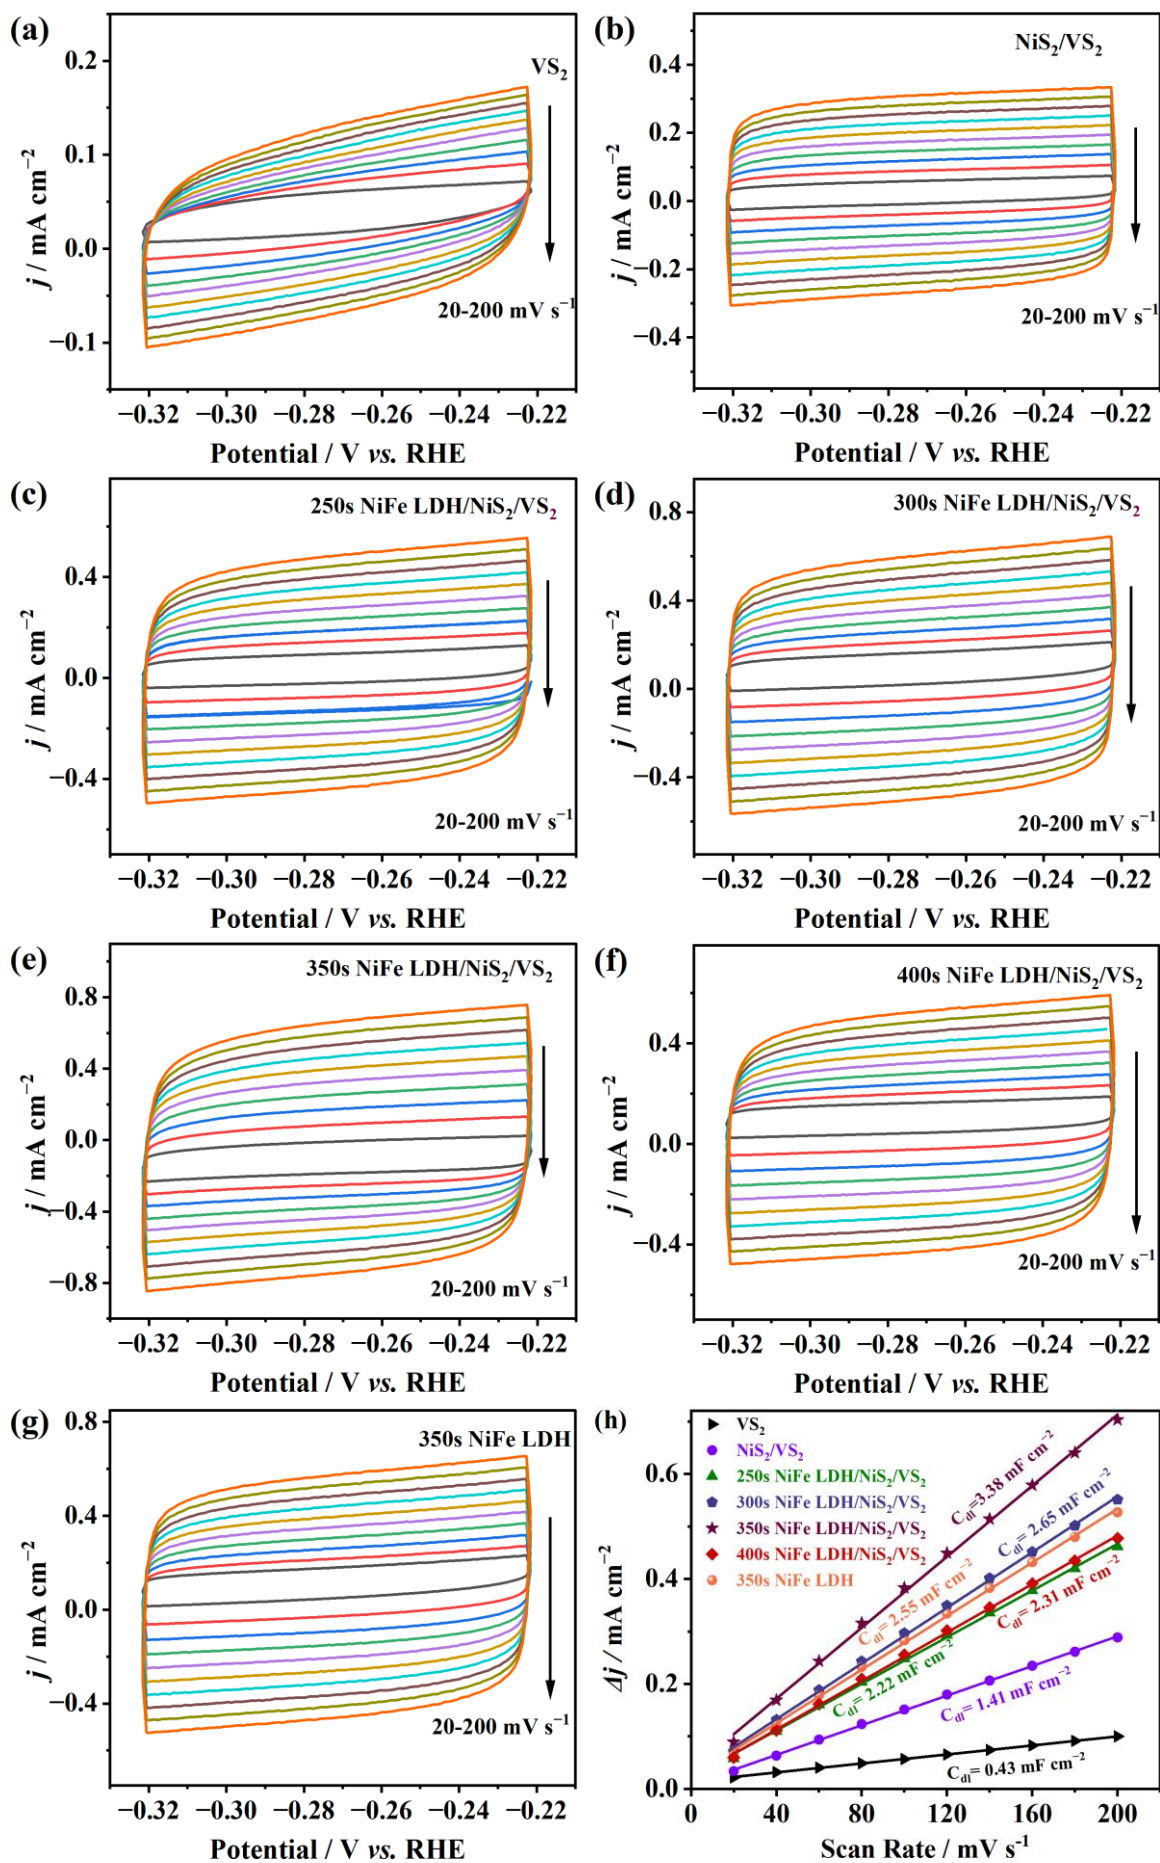

**Figure S3.** Cyclic voltammetry curves of the (a)  $\text{VS}_2$ , (b)  $\text{NiS}_2/\text{VS}_2$ , (c) 250s NiFe LDH/ $\text{NiS}_2/\text{VS}_2$ , (d) 300s NiFe LDH/ $\text{NiS}_2/\text{VS}_2$ , (e) 350s NiFe LDH/ $\text{NiS}_2/\text{VS}_2$ , (f) 400s NiFe LDH/ $\text{NiS}_2/\text{VS}_2$  and (g) 350s NiFe LDH at non-faradaic region with a different scan rates. (h) The  $C_{dl}$  value of the corresponding samples.

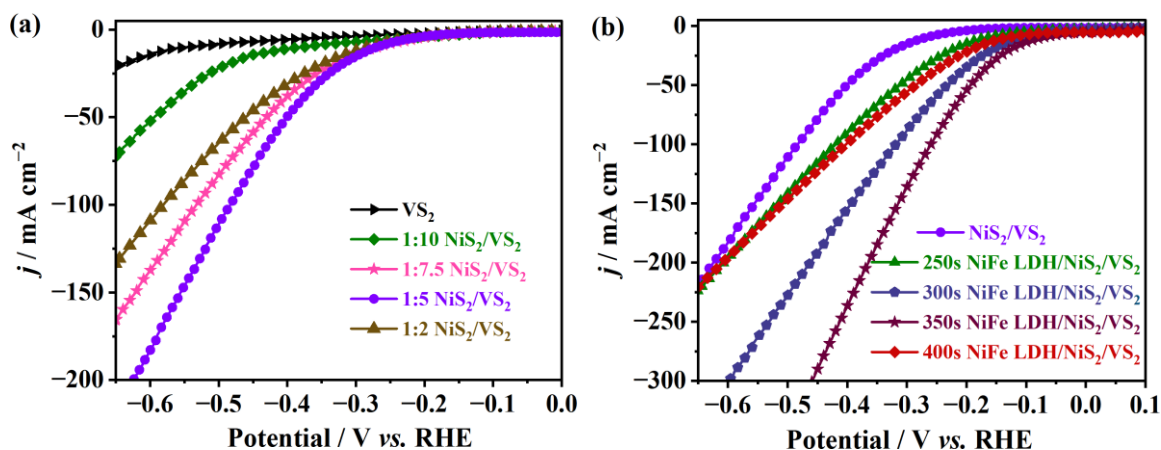

**Figure S4.** Electrocatalytic HER activity of (a) the  $\text{VS}_2$  and  $\text{NiS}_2/\text{VS}_2$  with different addition ratio of nickel source and (b) the NiFe LDH/ $\text{NiS}_2/\text{VS}_2$  with different electrodeposition time.

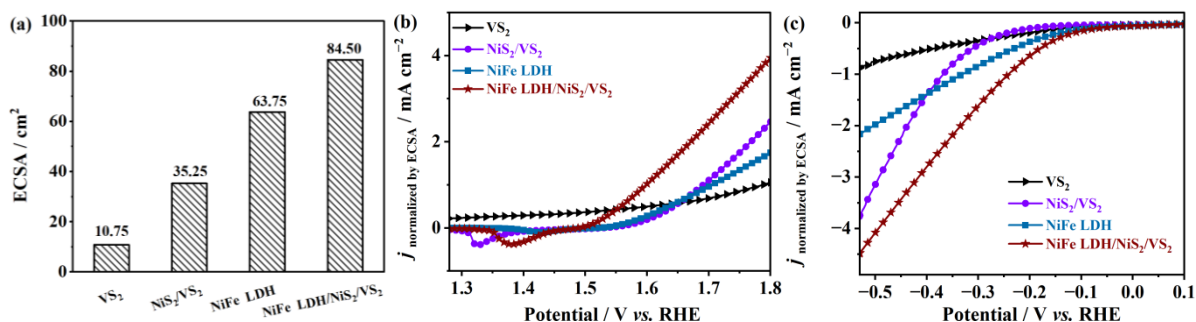

**Figure S5.** (a) ECSA and the electrocatalytic activity normalized by ECSA for (b) OER and (c) HER of the as-prepared  $\text{VS}_2$ ,  $\text{NiS}_2/\text{VS}_2$ , NiFe LDH and NiFe LDH/ $\text{NiS}_2/\text{VS}_2$ .

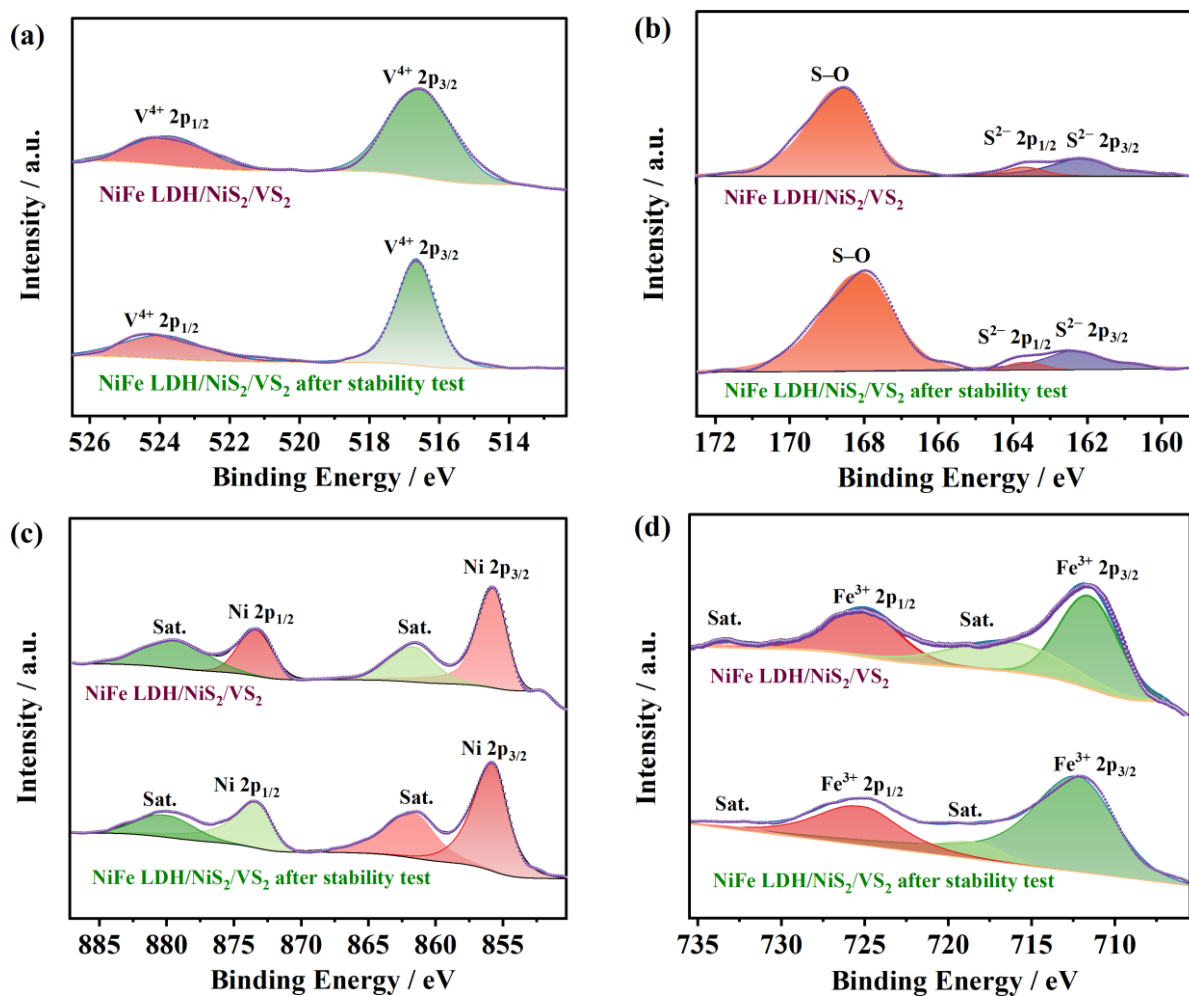

**Figure S6.** High-resolution XPS survey of the NiFe LDH/NiS<sub>2</sub>/VS<sub>2</sub> before and after stability test; (a) V 2p, (b) S 2p, (c) Ni 2p and (d) Fe 2p.

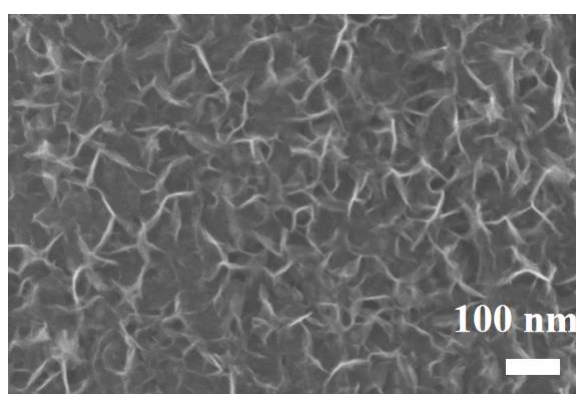

**Figure S7.** SEM of NiFe LDH/NiS<sub>2</sub>/VS<sub>2</sub> after stability test.

**Table S1.** Comparisons of HER and OER activity of NiFe LDH/NiS<sub>2</sub>/VS<sub>2</sub> with other electrocatalysts.

| Catalyst                                                                         | Electrolyte | HER                         |                                     | OER                           |                                     | Overall voltage @10 mA cm <sup>-2</sup> (V) | iR compensation | Ref.      |
|----------------------------------------------------------------------------------|-------------|-----------------------------|-------------------------------------|-------------------------------|-------------------------------------|---------------------------------------------|-----------------|-----------|
|                                                                                  |             | <i>h</i> <sub>10</sub> (mV) | Tafel slope (mV dec <sup>-1</sup> ) | <i>h</i> <sub>10</sub> (mV)   | Tafel slope (mV dec <sup>-1</sup> ) |                                             |                 |           |
| NiFe LDH/NiS <sub>2</sub> /VS <sub>2</sub>                                       | 1.0 M KOH   | 76                          | 79                                  | 286                           | 99                                  | 1.61                                        | no              | This Work |
| VS <sub>2</sub> /MoS <sub>2</sub>                                                | 1.0 M KOH   | 148                         | 69                                  | -                             | -                                   | -                                           | yes             | [62]      |
| VS <sub>2</sub>                                                                  | 1.0 M KOH   | 197                         | 139                                 | -                             | -                                   | -                                           | yes             | [63]      |
| VS <sub>2</sub> /NF                                                              | 1.0 M KOH   | 197                         | 134.39                              | 330                           | 87.25                               | -                                           | yes             | [64]      |
| CoMnS <sub>2</sub> @1T-Fe-VS <sub>2</sub> @NF                                    | 1.0 M KOH   | 89                          | 61                                  | 260 (20 mA cm <sup>-2</sup> ) | 51                                  | 1.51                                        | yes             | [65]      |
| NiCo <sub>2</sub> S <sub>4</sub> @C <sub>3</sub> N <sub>4</sub> @VS <sub>2</sub> | 1.0 M KOH   | 110                         | 71.8                                | -                             | -                                   | -                                           | -               | [66]      |
| VS <sub>2</sub> /rGO                                                             | 1.0 M KOH   | -                           | -                                   | 310                           | 72                                  | -                                           | yes             | [67]      |
| V-doped pyrite NiS <sub>2</sub>                                                  | 1.0 M KOH   | 85                          | 133                                 | -                             | -                                   | -                                           | yes             | [58]      |
| {0 0 1}-NiS <sub>2</sub> :Fe                                                     | 1.0 M KOH   | -                           | -                                   | 277                           | 57                                  | -                                           | yes             | [68]      |
| Fe-NiS <sub>2</sub> @g-C <sub>3</sub> N <sub>4</sub>                             | 1.0 M KOH   | -                           | -                                   | 280                           | 97.3                                | -                                           | yes             | [69]      |
| MoS <sub>2</sub> /NiFe LDH                                                       | 1.0 M KOH   | 98                          | 95                                  | 257                           | 59                                  | 1.61                                        | yes             | [47]      |
| Fe <sub>3</sub> O <sub>4</sub> /NiFe LDH/Fe <sub>3</sub> O <sub>4</sub>          | 1.0 M KOH   | 134                         | 141.5                               | 260 (50 mA cm <sup>-2</sup> ) | 89.7                                | 1.648                                       | yes             | [70]      |
| CoNiN@NiFe LDH                                                                   | 1.0 M KOH   | 150                         | 169                                 | 227                           | 58.1                                | 1.63                                        | yes             | [71]      |

|                                                  |              |     |     |                                      |    |      |     |      |
|--------------------------------------------------|--------------|-----|-----|--------------------------------------|----|------|-----|------|
| NiFe-LDH@Mo<br>-NiS-NiS <sub>2</sub> /NF         | 1.0 M<br>KOH | 120 | 105 | 261 (50<br>mA<br>cm <sup>-2</sup> )  | 86 | 1.63 | yes | [72] |
| Ni <sub>3</sub> S <sub>2</sub> /VG@NiC<br>o LDHs | 1.0 M<br>KOH | 120 | 87  | 350 (100<br>mA<br>cm <sup>-2</sup> ) | 65 | 1.66 | no  | [73] |
| CoS@NiFe<br>LDH/NF                               | 1.0 M<br>KOH | 95  | 90  | 250                                  | 49 | 1.65 | yes | [74] |

---
